# Supplementary material
Source: PubMed Central journal article supplement (PMC3837957)
Supplement: JB.00794-13_zjb999092905so1.pdf [file JB.00794-13_zjb999092905so1.pdf]

**Figure S1**

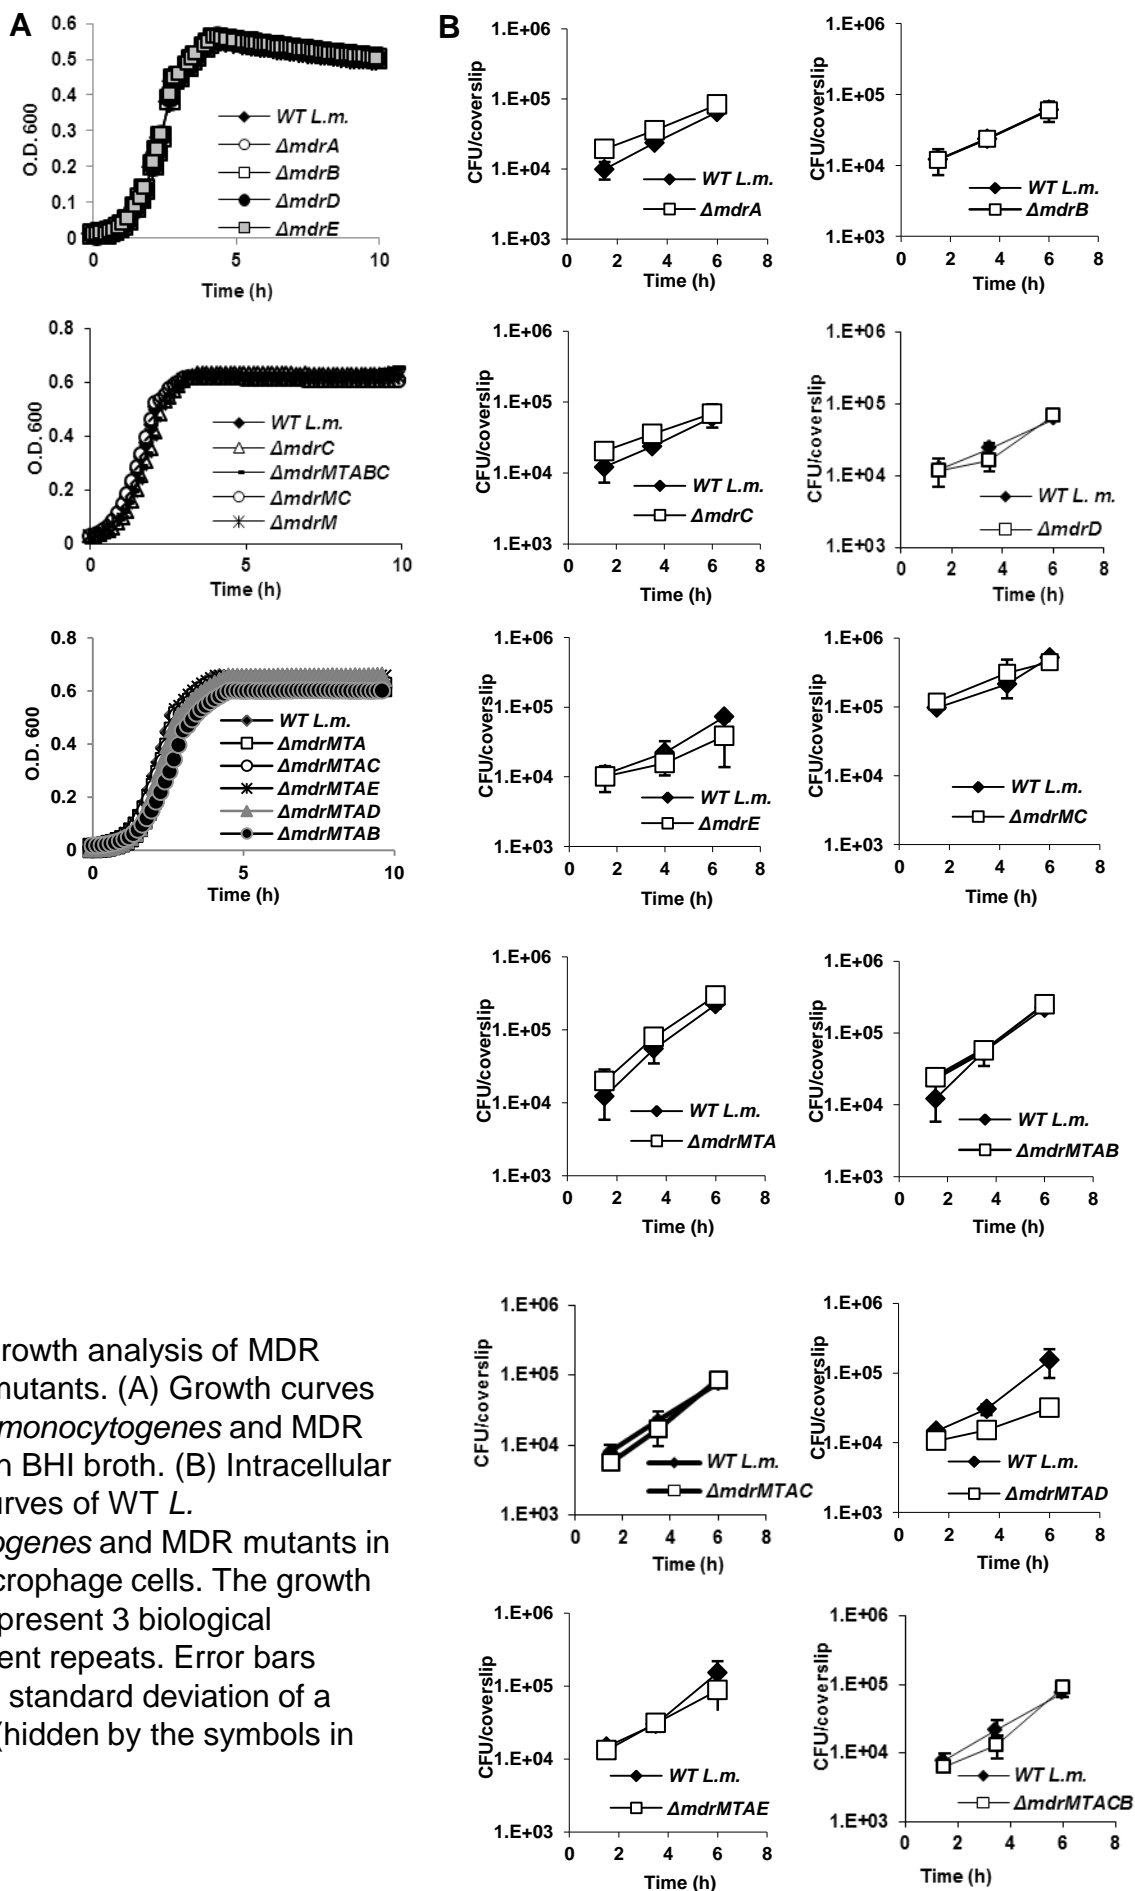

**FIG S1** Growth analysis of MDR deletion mutants. (A) Growth curves of WT *L. monocytogenes* and MDR mutants in BHI broth. (B) Intracellular growth curves of WT *L. monocytogenes* and MDR mutants in BMD macrophage cells. The growth curves represent 3 biological independent repeats. Error bars represent standard deviation of a triplicate (hidden by the symbols in panel A).

**Figure S2**

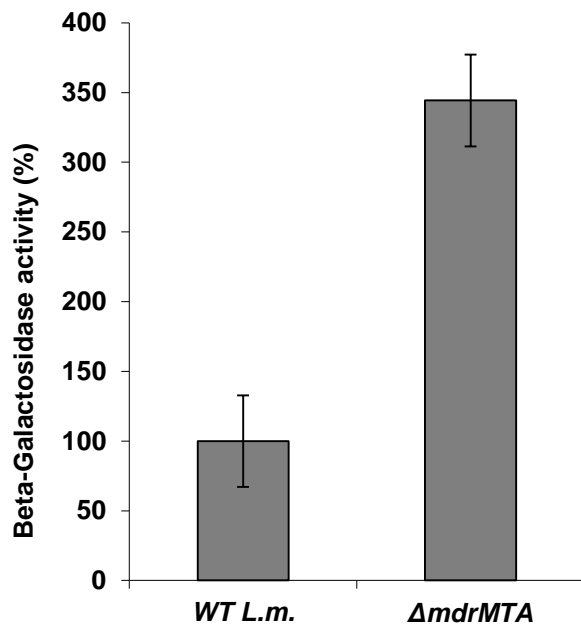

**FIG S2** Transcription analysis of *mdrC* gene in  $\Delta$ *mdrMTA* and WT bacteria. The relative activity of *mdrC* promoter was assayed in WT and  $\Delta$ *mdrMTA* *L. monocytogenes* bacteria using the *lacZ* reporter gene. *mdrC* promoter region was cloned up-stream the *lacZ* gene in the integrative plasmid pPL2. Beta-galactosidase activity of WT bacteria was set as 100%.

**Figure S3**

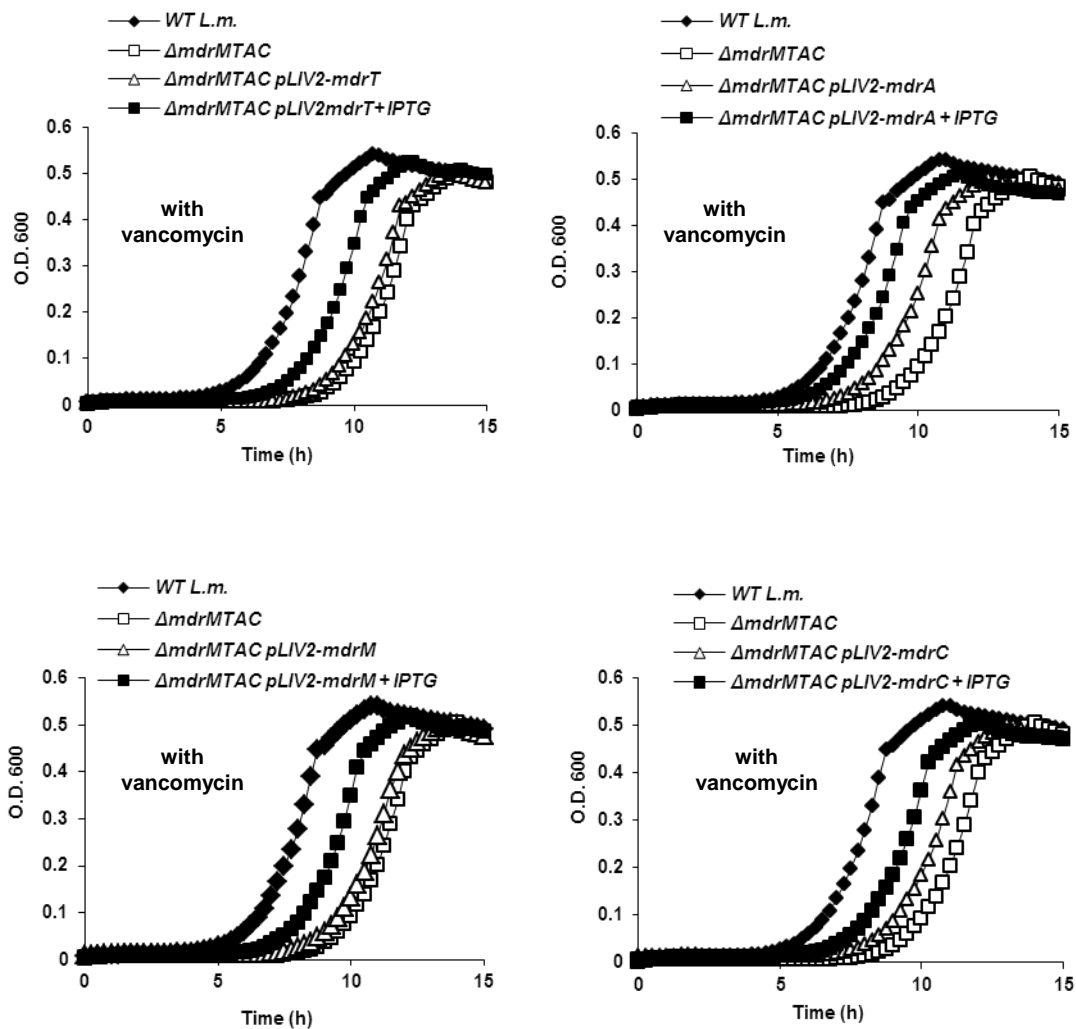

**FIG S3** Complementation experiments of  $\Delta$ *mdrMTAC* mutant. Growth analysis of WT *L. monocytogenes*,  $\Delta$ *mdrMTAC* mutant and  $\Delta$ *mdrMTAC* mutant complemented with pLIV2 plasmid expressing each one of the MTAC transporters (with and without IPTG). Experiments were performed in a 96-well format in a Synergy HT Biotek® plate reader. Error bars representing standard deviation of the triplicate are hidden by the symbols. Growth curves from one representative experiment are shown. Experiment was repeated independently 3 times.

**Figure S4**

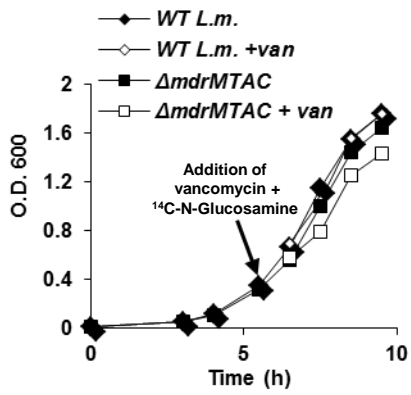

**FIG S4** Growth curves of WT *L. monocytogenes* and  $\Delta$ *mdrMTAC* mutant in BHI media, with and without 0.8  $\mu\text{g ml}^{-1}$  of vancomycin (van). The vancomycin concentration used in this experiment was lower than the one used in figure 5C. Arrow indicates addition of [<sup>14</sup>C]-N-acetylglucosamine and vancomycin.

**Figure S5**

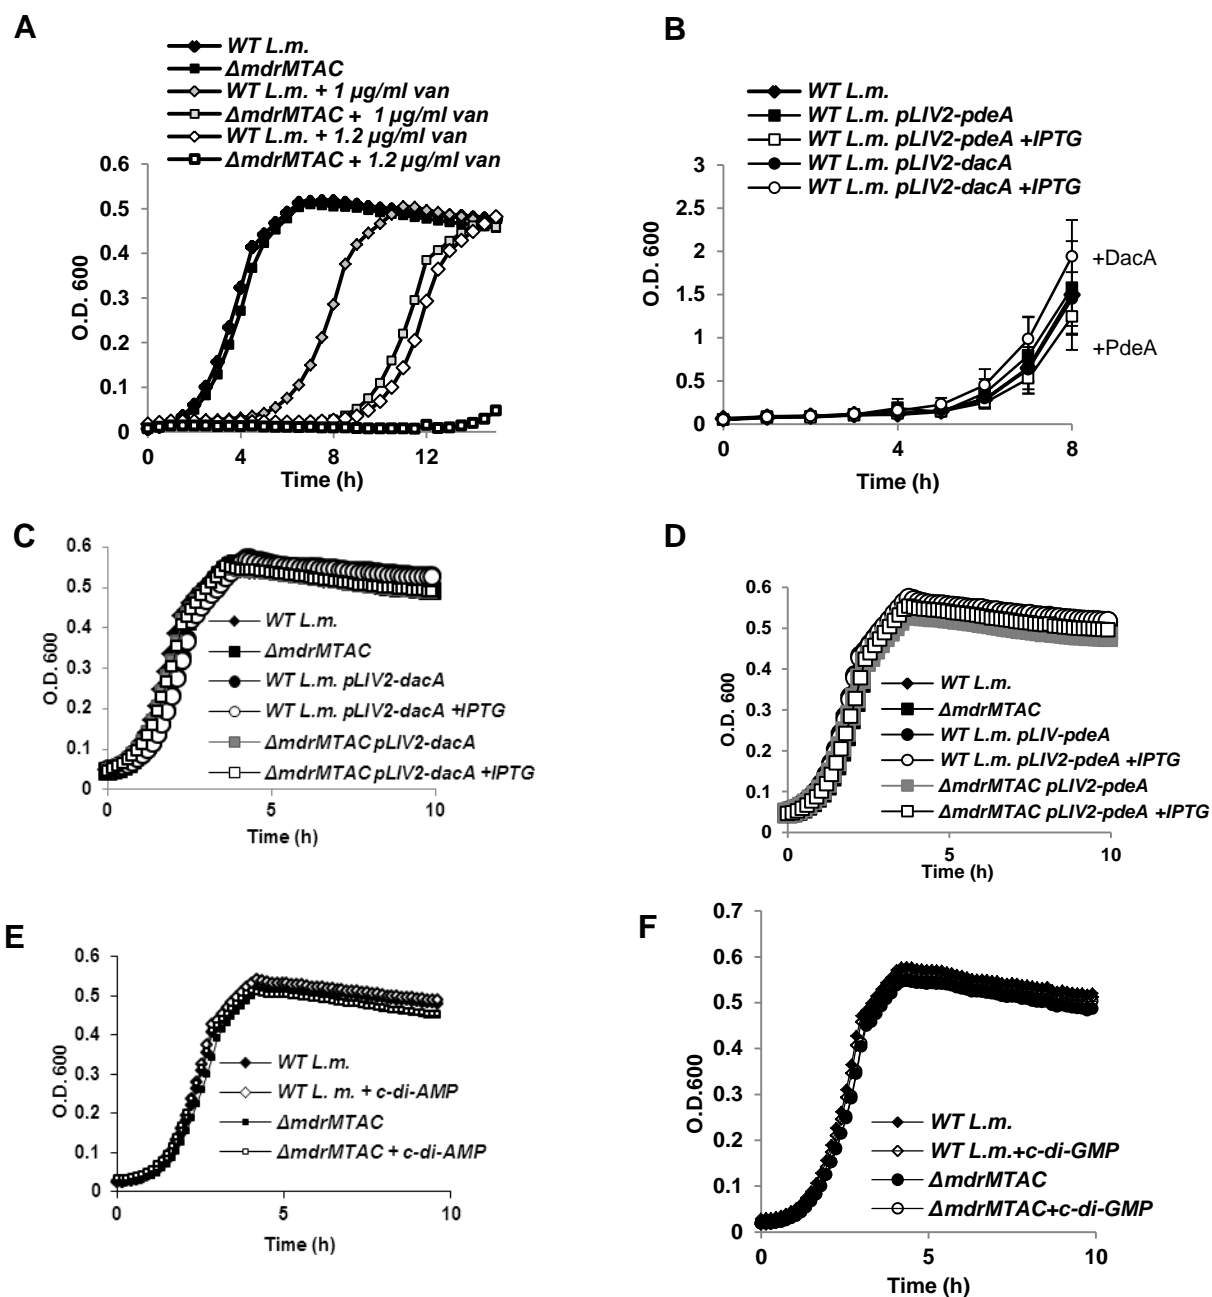

**FIG S5** Effect of c-di-AMP on *L. monocytogenes* growth with and without vancomycin stress. (A) Growth curves of WT *L. monocytogenes* and  $\Delta mdrMTAC$  mutant with and without vancomycin. Two vancomycin concentrations were used: 1 and 1.2  $\mu\text{g ml}^{-1}$ . Bacteria were grown in a 96 well microplate reader. (B) Growth curves of WT *L. monocytogenes* strains harboring the pLIV2 plasmid with an IPTG inducible promoter, expressing *dacA* or *pdeA* genes in BHI supplemented with vancomycin (1.2  $\mu\text{g ml}^{-1}$ ) with or without IPTG. Experiment was performed in flasks. The data is a mean of 3 independent biological experiments. Error bars represent standard deviation. (C) Growth curves of WT *L. monocytogenes* and  $\Delta mdrMTAC$  mutant harboring pLIV2-*dacA* plasmid in BHI with and without IPTG addition. (D) Growth curves of WT *L. monocytogenes* and  $\Delta mdrMTAC$  mutant harboring pLIV2-*pdeA* plasmid in BHI with and without IPTG addition. (E) Growth curves of WT *L. monocytogenes* or  $\Delta mdrMTAC$  mutant in BHI with and without addition of 3  $\mu\text{g ml}^{-1}$  of purified c-di-AMP or c-di-GMP (F). Experiments were performed in a 96-well format in a Synergy HT Biotek® plate reader. Error bars representing standard deviation of the triplicate are hidden by the symbols. Growth curves from one representative experiment are shown. Experiment was repeated independently 3 times.

# Supporting information TableS1. Primers used in this study

## A. Bacterial RT-qPCR Primers

| Name              | Sequence (5'-3')            |
|-------------------|-----------------------------|
| <i>mdrD</i> -F    | TGAATGTGTCTGGTTTGCAACTTTAT  |
| <i>mdrD</i> -R    | AAGCCATGCTAACCGTTTCTG       |
| <i>mdrC</i> -F    | GGCCGTGCAATCTGACCTT         |
| <i>mdrC</i> -R    | CCTGAGAATAGCGCGTTAAA        |
| <i>mdrB</i> -F    | CGCAAATCAACGCCACAAT         |
| <i>mdrB</i> -R    | CAGAGCCAAGAATCCGAAGA        |
| <i>mdrM</i> -F    | CAGCAAGTACATCAGTGAAGCGTAA   |
| <i>mdrM</i> -R    | GGTAGCGCGACATTCATCAA        |
| <i>mdrT</i> -F    | CCGTGCGGTTCTTCGGTAT         |
| <i>mdrT</i> -R    | TTTACTGCCGAACCGTGGTT        |
| <i>mdrA</i> -F    | GCAACAGGTGGGCAGAAAAT        |
| <i>mdrA</i> -R    | GCGCCATGTTAAGAGCAGTTT       |
| <i>hly</i> -F     | TAAAAACAATGTATTAGTATACCACGG |
| <i>hly</i> -R     | GATTCAACAATTGAATGTCTGC      |
| <i>rpoB</i> -F    | GCGGATGAAGAGGATAATTACG      |
| <i>rpoB</i> -R    | TAGTCAATACGTTCTTTTTCTACC    |
| <i>mdrE</i> -F    | GTGGAACGCAAATGGAAGCT        |
| <i>mdrE</i> -R    | TTCCAACCTCCAGCAATCG         |
| 16S rRNA-F        | CCTGGTAGTCCACGCCGT          |
| 16S rRNA-R        | TGCGTTAGCTGCAGCACTAAG       |
| <i>dacA</i> -RT-F | CGTGAACAGCATCATTTAATCGA     |
| <i>dacA</i> -RT-R | GTATCGCGTGCCACTGAAATC       |
| <i>pdeA</i> -F    | CCAACCTGGGCTAGGGAACATC      |
| <i>pdeA</i> -R    | CCTCCGTCAAAAAGGCCATA        |

## D. Primers for deletions of bacterial genes

| Name                   | Sequence (5'-3')                                          |
|------------------------|-----------------------------------------------------------|
| <i>mdrB</i> -A-Sall-F  | ACTAT <u>GTCGAC</u> GCAGTAATCACGTTCTTGCGCA                |
| <i>mdrB</i> -B-R       | TCGGTAACCGGAATACAAGTAGGTATTACGTTTATTTCGTCTGTTC<br>CATGA   |
| <i>mdrB</i> -C-F       | TCATGGAACAGACGAATAAACGTAATACCTACTTGTATTCCGGTT<br>ACCGA    |
| <i>mdrB</i> -D-PstI-R  | ATTAC <u>CTGCAG</u> AGCTTGTCTGGCAAGTATTTCTT               |
| <i>mdrE</i> -A2-KPNI-F | ATACT <u>GGTACC</u> CTTTGTAAATTATCTGGAATCTCCATC           |
| <i>mdrE</i> -B-R       | GACAAGACTTTGGACGAAGGACAATAGCTAACATCTCTTGTGAA<br>GTG       |
| <i>mdrE</i> -C-F       | CACTTCACAAGAGATGTTAGCTATTGTCCCTTCGTCAAAAGTCTTG<br>TC      |
| <i>mdrE</i> -D2-Pst-R  | ATAAC <u>CTGCAG</u> TAAACGAGTCCGCCAGAAGTGG                |
| <i>mdrC</i> -A-Sall-F  | ATTAT <u>GTCGAC</u> CTCAGAAATGCCCGTTAGGTA                 |
| <i>mdrC</i> -B-R       | AGAATAACTAATGACTTCAACAGCGTAGCGCTCGAATTA<br>CGCA           |
| <i>mdrC</i> -C-F       | TGCGGCTTTTAAATTCGAGCGCTACGCTGTTGAAGTCATTAGTTAT<br>TCT     |
| <i>mdrD</i> -A-Sall-F  | ATTAT <u>GTCGAC</u> TCTCATTTATGCGCTAGATTATCC              |
| <i>mdrD</i> -B-R       | AAGGCCTATTATTTGAACTATTTATCTTTTCATATCCACATTGTTT<br>CCCCCTA |
| <i>mdrD</i> -C-F       | TAGGGGAAACAATGTGGATATGAAAAGATAAATAGTTCAAATA<br>TAGGCCTT   |
| <i>mdrD</i> -D-PstI-R  | ATTAT <u>CTGCAG</u> TTTCTAGCGCCTTATCGAGCT                 |
| <i>mdrA</i> -A-Sall-F  | ATTAT <u>GTCGAC</u> CACGGTCAGTTGTGTTTAGCATTG              |
| <i>mdrA</i> -B-R       | TCGCTTTATTATTTAGCTTTACGACCTGTTGCTTCTTGTTCAT               |
| <i>mdrA</i> -C-F       | ATGCAACAAGAAGCAACAGGTCGTAAGCTAATAATAAAGCGA                |
| <i>mdrA</i> -D-KpnI-R  | ATTAT <u>GGTACC</u> GCACAATCGTTTCCGGATCAT                 |

\*Restriction sites are underlined

## B. Murine macrophage RT-qPCR primers

| Name            | Sequence (5'-3')       |
|-----------------|------------------------|
| <i>Ifnβ</i> -F  | CCAAGAAAGGACGAACATTTCG |
| <i>Ifnβ</i> -R  | CCGCCCTGTAGGTGAGGTT    |
| <i>gapDH</i> -F | TTGTGGAAGGGCTCATGACC   |
| <i>gapDH</i> -R | TCTTCTGGGTGGCAGTGATG   |
| <i>IL1α</i> -F  | AGGAGAGCCGGGTGACAGTA   |
| <i>IL1α</i> -R  | TCAGAATCTTCCCGTTGCTTG  |
| <i>IL6</i> -F   | TTCCATCCAGTTGCCTTCTTG  |
| <i>IL6</i> -R   | GAAGGCCGTGTTGTCACC     |

## C. Primers used for construction of pLIV2 based plasmids

| Name                    | Sequence (5'-3')                                                |
|-------------------------|-----------------------------------------------------------------|
| <i>mdrM</i> -His-F      | CTTGTCGGCTTGATTATTATGG                                          |
| <i>mdrM</i> -His-R      | TATAGTCGACTTAATGATGATGATGATGATGCGTACGTGCTTTTTCGTTTATAGTAAACAATT |
| M-F58V-Scal-F           | CAGTCAAGGACAATGGTTA <u>AGTACT</u> GGAGTTATGTTAGTTAATGGTGTG      |
| M-F58V-Scal-R           | GACACCATTAACATAACTCC <u>AGTACT</u> TAAACCATTGTCCTTGACTG         |
| pLIV2-Oid seq-F         | TATACGGTGGATGCATTTCAAATTG                                       |
| <i>dacA</i> -F-EagI-F   | GAGGAG <u>CGGCCG</u> GATGGATTTTTCCAATATGTCGATATTG               |
| <i>dacA</i> -R-Sall-R   | GAGGAG <u>GTCGAC</u> ATTTAAAATTCGATCCATCATTTCGCT                |
| <i>pdeA</i> -pLIV2-EagI | AAAA <u>CGGCCG</u> GATGTCAGGCTATTTTCAAAAACG                     |
| <i>pdeA</i> -pLIV2-SpeI | TTTT <u>ACTAGT</u> TTTATGTTTCTCCCTTCCAATACG                     |
| <i>mdrC</i> -F-BamHI    | ATTAG <u>GATCC</u> ATGACTTCAACAGCGTATAAAA                       |
| <i>mdrC</i> -R-PstI-2   | TAAT <u>CTGCAG</u> CTATTCTTTTGGCGCTTTTAAT                       |
| <i>mdrA</i> -F-BamHI    | ATTAG <u>GATCC</u> ATGCAACAAGAAGCAACAGGTTG                      |
| <i>mdrA</i> -R-pstI     | TAAT <u>CTGCAG</u> TACGAGAAGTTCTCTTCGCT                         |

\*Restriction sites are underlined
